# Supplementary material for: San-Zhong-Kui-Jian-Tang Exerts Antitumor Effects Associated With Decreased Cell Proliferation and Metastasis by Targeting ERK and the Epithelial–Mesenchymal Transition Pathway in Oral Cavity Squamous Cell Carcinoma
Source: PubMed Central journal article supplement — Integr Cancer Ther. 2022 Nov 19;21:15347354221134921. doi: 10.1177/15347354221134921 (PMC9679344; doi:10.1177/15347354221134921), 2022-11-19
Supplement: sj-pdf-1-ict-10.1177_15347354221134921.pdf [file sj-pdf-1-ict-10.1177_15347354221134921.pdf]

San-Zhong-Kui-Jian-Tang exerts antitumor effects associated with decreased cell proliferation and metastasis by targeting ERK and the epithelial–mesenchymal transition pathway in oral cavity squamous cell carcinoma

Pei-Yu Hsu<sup>1,2</sup>, Jiun-Liang Chen<sup>1,3</sup>, Shun-Li Kuo<sup>1,2,3</sup>, Wan-Ling Wang<sup>4,5</sup>, Fei-Wen Jan<sup>5</sup>, Sien-Hung Yang<sup>1,2,3,6\*</sup>, Chia-Yu Yang<sup>4,5,7,8\*</sup>

<sup>1</sup> Department of Traditional Chinese Medicine, Chang Gung Memorial Hospital, Taoyuan, Taiwan

<sup>2</sup> Graduate Institute of Clinical Medical Sciences, College of Medicine, Chang Gung University, Taoyuan, Taiwan

<sup>3</sup> School of Traditional Chinese Medicine, College of Medicine, Chang Gung University, Taoyuan, Taiwan

<sup>4</sup> Molecular Medicine Research Center, Chang Gung University, Taoyuan, Taiwan

<sup>5</sup> Department of Microbiology and Immunology, College of Medicine, Chang Gung University, Taoyuan, Taiwan

<sup>6</sup> Research Center for Chinese Herbal Medicine, Chang Gung University of Science and Technology, Taoyuan, Taiwan

<sup>7</sup> Department of Otolaryngology Head and Neck Surgery, Chang Gung Memorial Hospital, Taoyuan, Taiwan

<sup>8</sup> Graduate Institute of Biomedical Sciences, College of Medicine, Chang Gung University, Taoyuan, Taiwan

\* Corresponding author: Chia-Yu Yang and Sien-Hung Yang

Chia-Yu Yang, Department of Microbiology and Immunology, College of Medicine, Chang Gung University, Taoyuan, Taiwan

Address: No.259, Wenhua 1st Rd., Guishan Dist., Taoyuan City 33302, Taiwan (R.O.C.)

[Tel:+886-3-2118800#3527](tel:+886-3-2118800#3527) /Fax:+886-3-2118700

Email: [chiayu-yang@mail.cgu.edu.tw](mailto:chiayu-yang@mail.cgu.edu.tw)

Sien-Hung Yang, School of Traditional Chinese Medicine, College of Medicine, Chang Gung University, Taoyuan, Taiwan

Address: No.259, Wenhua 1st Rd., Guishan Dist., Taoyuan City 33302, Taiwan (R.O.C.)

[Tel:+886-3-2118800#5101](tel:+886-3-2118800#5101)

Email: [dryang@mail.cgu.edu.tw](mailto:dryang@mail.cgu.edu.tw)

**Table S1. Composition of SZKJT**

| <b>Component</b>                             | <b>Chinese name</b> | <b>Family</b> | <b>Part used</b>  | <b>Origin/Batch number</b>          | <b>Weight (g)</b> |
|----------------------------------------------|---------------------|---------------|-------------------|-------------------------------------|-------------------|
| <i>Scutellaria baicalensis</i> Georgi        | Huang Qin           | Labiatae      | roots             | Shan Xi (PR China)/M1204-1904021    | 4.0               |
| <i>Gentiana scabra</i> Bunge                 | Long Dan            | Gentianaceae  | roots and rhizome | Liao Ning (PR China)/M1705-1902251  | 2.5               |
| <i>Trichosanthes kirilowii</i> Maxim.        | Tian Hua Fen        | Cucurbitaceae | roots             | Jiang Su (PR China)/M1093-1901071   | 2.5               |
| <i>Phellodendron chinense</i> C.K.Schneid.   | Huang Bo            | Rutaceae      | bark              | Si Chuan (PR China)/M1203-1901181   | 4.0               |
| <i>Anemarrhena asphodeloides</i> Bunge       | Zhi Mu              | Liliaceae     | rhizome           | Nei Meng (PR China)/M0824-1902201   | 2.5               |
| <i>Platycodon grandiflorus</i> (Jacq.) A.DC. | Jie Geng            | Campanulaceae | roots             | An Hui (PR China)/M1015-1902151     | 2.5               |
| <i>Laminaria japonica</i> Aresch.            | Kun Bu              | Laminariaceae | kelp              | Bei Hai Dao (Japan) / M0958-1901181 | 2.5               |
| <i>Bupleurum chinense</i> DC.                | Chai Hu             | Umbelliferae  | roots             | Shan Xi (PR China)/M1055-1904161    | 2.5               |
| <i>Glycyrrhiza uralensis</i> Fisch.          | Gan Cao             | Leguminosae   | roots and rhizome | Gan Su (PR China)/ M0521-1901031    | 1.5               |
| <i>Sparganium stoloniferum</i>               | San Leng            | Sparganiaceae | rhizome           | Zhe Jiang (PR China)/M0311-         | 1.5               |

|                                                  |               |               |         |                                           |     |
|--------------------------------------------------|---------------|---------------|---------|-------------------------------------------|-----|
| (Graebn.)<br>Buch.-Ham. ex<br>Juz                |               |               |         | 1710181                                   |     |
| <i>Curcuma<br/>phaeoaulis</i><br>Valeton         | E Zhu         | Zingiberaceae | rhizome | Guang Xi (PR<br>China)/M1110-<br>1805221  | 1.5 |
| <i>Forsythia<br/>suspense</i><br>(Thunb.) Vahl   | Lian<br>Qiao  | Oleaceae      | fruits  | Shan Xi (PR<br>China)/M1132-<br>1901301   | 1.5 |
| <i>Pueraria<br/>lobata</i> (Willd.)<br>Ohwi      | Ge Gen        | Leguminosae   | roots   | Si Chuan (PR<br>China)/M1188-<br>1903111  | 1.5 |
| <i>Paeonia<br/>lactiflora</i> Pall.              | Bi Shao       | Ranunculaceae | roots   | An Hui (PR<br>China)/M0502-<br>1904151    | 1.0 |
| <i>Angelica<br/>sinensis</i> (Oliv.)<br>Diels    | Dang<br>Gui   | Umbelliferae  | roots   | Gan Su (PR<br>China)/M1307-<br>1708071    | 1.0 |
| <i>Coptis<br/>chinensis</i><br>Franch.           | Huang<br>Lian | Ranunculaceae | rhizome | Si Chuan (PR<br>China)/M1205-<br>1901301  | 1.0 |
| <i>Cimicifuga<br/>dahurica</i><br>(Turcz.)Maxim. | Sheng<br>Ma   | Ranunculaceae | rhizome | Liao Ning (PR<br>China)/M0437-<br>1812241 | 0.5 |

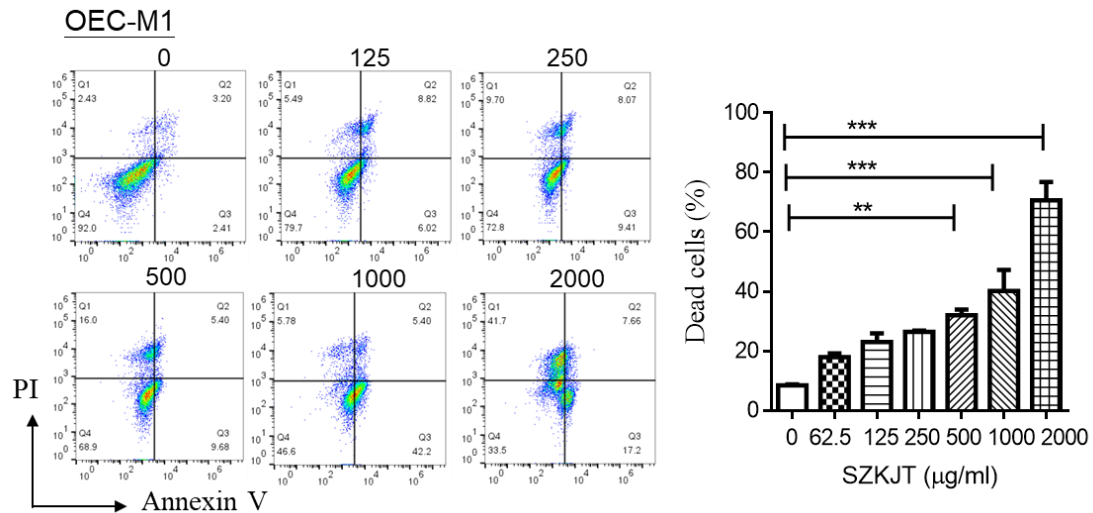

**Figure S1. SZKJT induced OEC-M1 cell death.** Flow cytometry analysis of OEC-M1 cell treated with a control or SZKJT at different concentrations (125, 250, 500, 1000, or 2000 µg/mL) for 48 h. Quantification of cell death in OEC-M1 cell by Annexin V-FITC/PI staining. The bar diagram shows the percentages of death cells. The results were obtained from three independent experiments. \*\*\* $p < 0.001$ ; \*\* $p < 0.01$ .

## OEC-M1

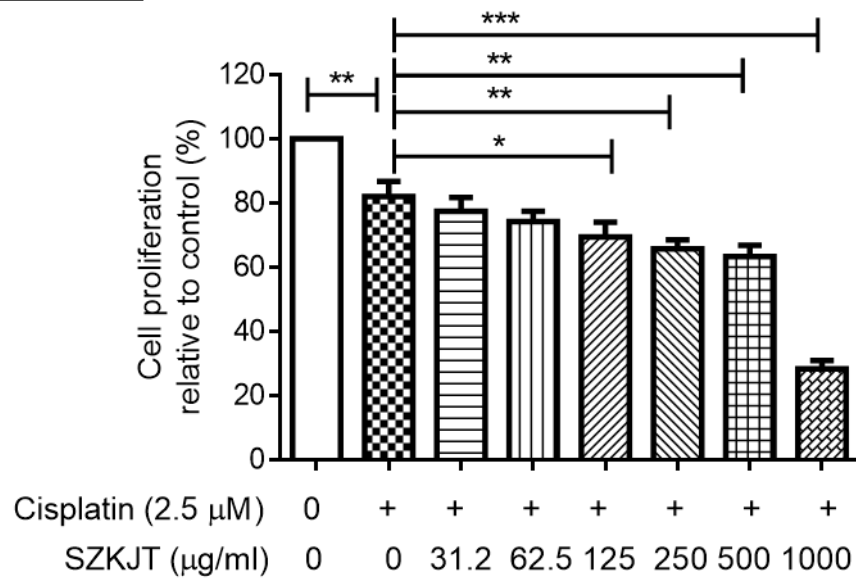

**Figure S2. Concurrent treatment with SZKJT enhanced the therapeutic efficacy of cisplatin in OEC-M1 cell line.** Cells were treated with a control treatment, 2.5 μM cisplatin, or 2.5 μM cisplatin with and SZKJT at different doses for 48 h and then assessed by MTT assay. The results are expressed as the percent cell proliferation relative to the proliferation of the control. Cisplatin and SZKJT synergistically inhibited proliferation in the OECM1 cell line. \*\*\* $p < 0.001$ ; \*\* $p < 0.01$ ; \* $p < 0.05$ .

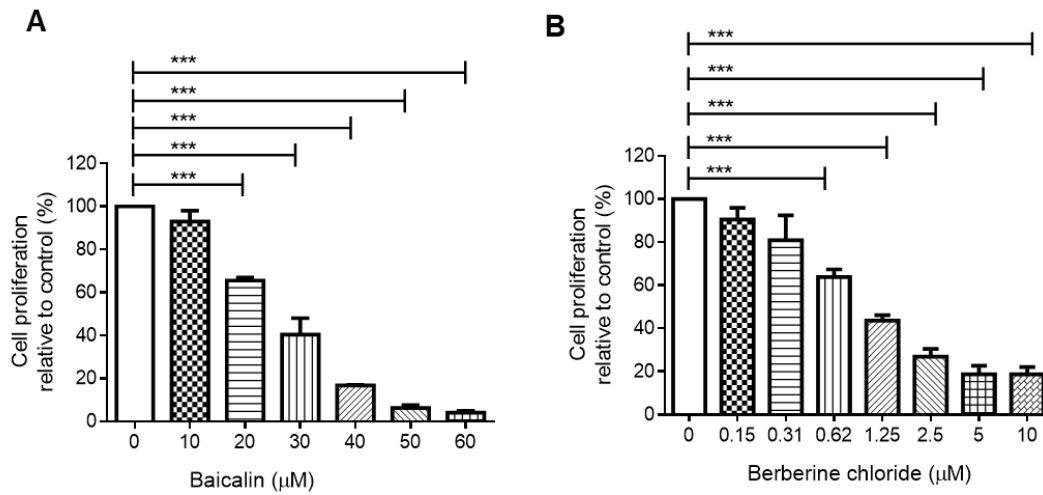

**Figure S3. Inhibitory effect of baicalin and berberine on the proliferation of SAS.**

SAS cells were treated with a control, baicalin (A), or berberine (B) at different doses

for 48 h and assessed by MTT assay. The results are expressed as the percent cell

proliferation relative to the proliferation of the control. \*\*\* $p < 0.001$ .

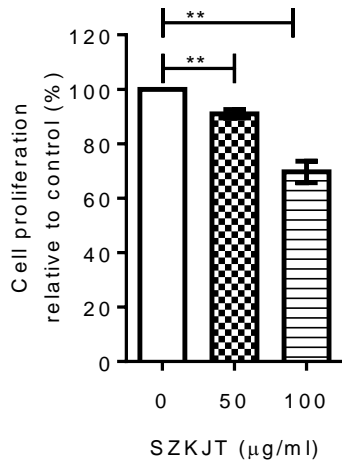

**Figure S4. The effect of SZKJT on the proliferation of SG cells.** SG cells were treated with SZKJT at different doses for 48 h and then analyzed by MTT assay. The results are expressed as the percent cell proliferation relative to the proliferation of the control.  $**p < 0.01$ ;  $*p < 0.05$ .
